# Supplementary material for: Effects of RANKL Knockdown by Virus-like Particle-Mediated RNAi in a Rat Model of Osteoporosis
Source: PubMed Central journal article supplement — Mol Ther Nucleic Acids. 2018 Jul 11;12:443–52. doi: 10.1016/j.omtn.2018.06.001 (PMC6041464; doi:10.1016/j.omtn.2018.06.001), 2018-07-11
Supplement: mmc1.pdf [file mmc1.pdf]

**OMTN, Volume 12**

**Supplemental Information**

**Effects of RANKL Knockdown**

**by Virus-like Particle-Mediated RNAi**

**in a Rat Model of Osteoporosis**

**Daniel B. Hoffmann, Jens Gruber, Kai O. Böker, Delia Deppe, Stephan Sehmisch, Arndt F. Schilling, Nicolas Lemus-Diaz, Marina Komrakova, and Stefan Schneider**

Supplementary material

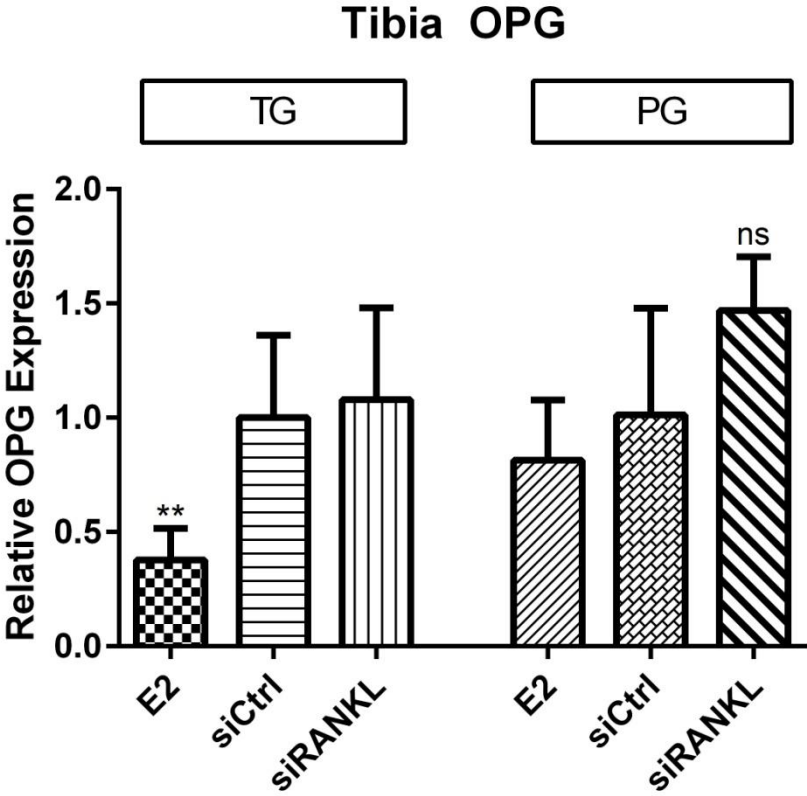

Fig. S1: Expression of OPG-mRNA in tibiae in 3 selected animals with highest RANKL-knockdown. In the TG, E2-administration led to a significant knockdown of OPG, whereas siRANKL showed no effect. In the PG, E2-mediated RANKL downregulation no longer showed significant differences for OPG-expression, whereas in RANKL-knockdown cohorts, a tendency of increased OPG expression could be observed. \*\* p<0.01 vs. siCtrl in TG

## Complete Western Blot

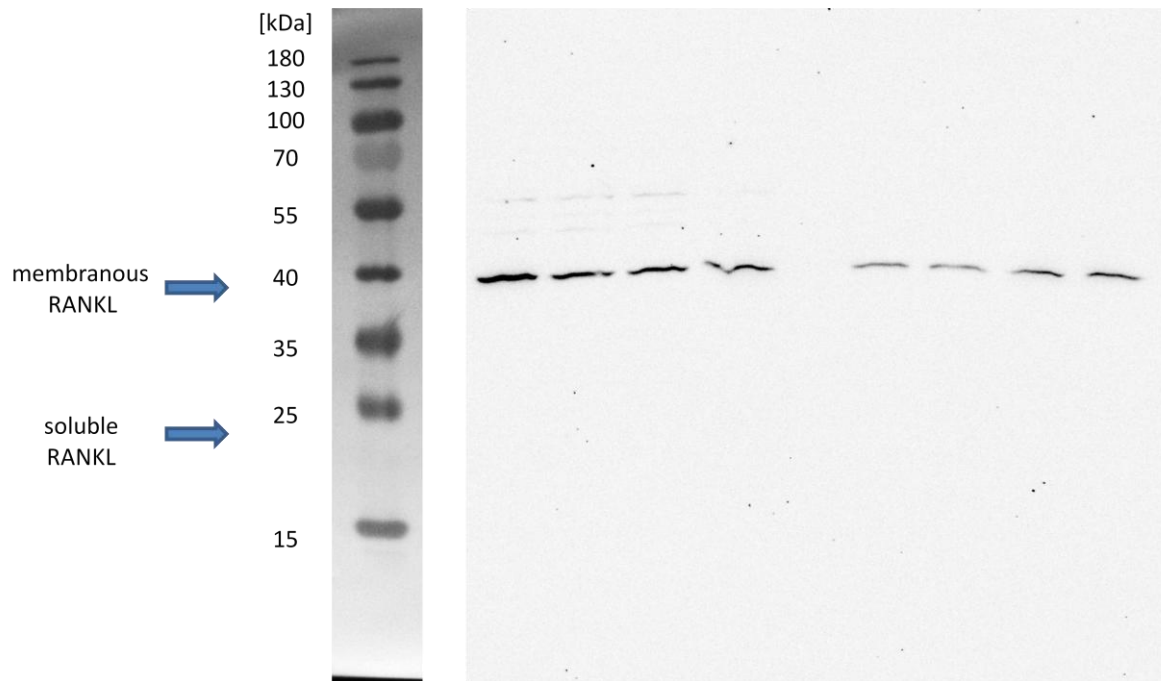

**Fig. S2: A complete Western blot of the tibia. The membranous RANKL is detected at around 40 kDa. There was no soluble RANKL detected in tibiae samples. GAPDH-Antibody (loading control, not shown) was used after primary and secondary antibodies for RANKL were removed according to a standard stripping protocol.**
